# Supplementary material for: Rubber Degrading Strains: Microtetraspora and Dactylosporangium
Source: MDPI journal article supplement (doi:10.3390/polym13203524), 2021-10-13
Supplement: s1 [file s1]

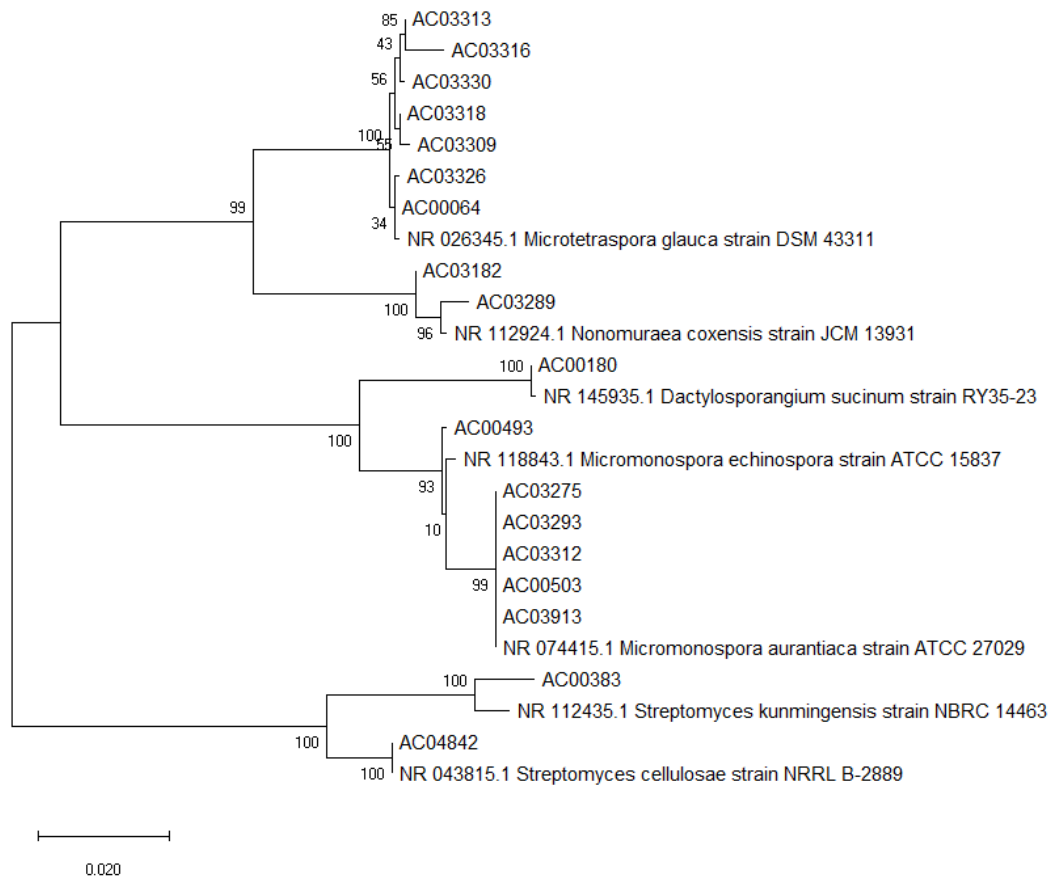

**Figure S1.** Clear zone forming strains 16S rRNA evolutionary relationships of taxa together with top 1 blast homology in GenBank database. The tree was constructed using MEGA X. The Bootstrap value was 1000. The bar below the phylogenetic trees represents the scale of sequence divergence.
