# Supplementary material for: Rubber Degrading Strains: Microtetraspora and Dactylosporangium
Source: MDPI journal article supplement (doi:10.3390/polym13203524), 2021-10-13
Supplement: s1 [file s1]

Supplementary Figure S2. Latex clearing protein (lcp) amino acid sequence alignment of the 18 clear zone forming strains to determine the 13-residue long highly conserved region.

|                               |                                                          |
|-------------------------------|----------------------------------------------------------|
| Dactylosporangium sp. AC04546 | KTRLVHA AVRHLLEQSPYWA AVAD-EEIPISQRDMMVTW HSLPTTVMQKLT   |
| Micromonospora sp. AC00493    | KTRLVHA AVRHLLEQSPYW PQVAD-EEIPISQRDMMVTW HSLPTTVMQKLV   |
| Micromonospora sp. AC03293    | -----MMVTW HNLPTTVMQKLT                                  |
| Micromonospora sp. AC00064    | KTRLIHA AVRHLLEKSPYW QQSAD-EEIPISQADMMVTW HSLPTTVMKTLQ   |
| Micromonospora sp. AC00503    | KTRLTHA AVRHLLEQSA PWRGVTD-HPIPI SNGDILITFHSLGTYV H RKLL |
| Micromonospora sp. AC03275    | KTRLTHA AVRHLLEQSA PWRGVTD-HPIPI SNGDILITFHSLGTYV H RKLL |
| Micromonospora sp. AC03913    | KTRLTHA AVRHLLEQSA PWRGVTD-HPIPI SNGDILITFHSLGTYV H RKLL |
| Microtetraspora sp. AC03312   | KTRLTHA AVRHLLEQSA PWRGVTD-HPIPI SNGDILITFHSLGTYV H RKLL |
| Microtetraspora sp. AC03326   | KTRLTHA AVRHLLEQSA PWRGVTD-HPIPI SNGDILITFHSLGTYV H RKLL |
| Microtetraspora sp. AC03309   | KTRLVHA AVRHLLEKSPYW QKSAD-EEIPISQADMMVTW HSLPTTVMKTLQ   |
| Microtetraspora sp. AC03313   | KTRLVHA AVRHLLEKSPYW QKSAD-EEIPISQADMMVTW HSLPTTVMKTLQ   |
| Microtetraspora sp. AC03316   | KTRLVHA AVRHLLEKSPYW QKSAD-EEIPISQADMMVTW HSLPTTVMKTLQ   |
| Microtetraspora sp. C03318    | KTRLVHA AVRHLLEKSPYW QKSAD-EEIPISQADMMVTW HSLPTTVMKTLQ   |
| Microtetraspora sp. AC03330   | KTRLVHA AVRHLLEKSPYW QKSAD-EEIPISQADMMVTW HSLPTTVMKTLQ   |
| Nonomuraea sp. AC03182        | KTRLVHA AVRHLLEQSPYW PQVAD-EEIPISQRDMMVTW HSLPTTVMQKLV   |
| Nonomuraea sp. AC03289        | KTRLVHA AVRHLLEQSPYW SQVAD-EEIPISQRDMMVTW HSLPTTVMQKLV   |
| Streptomyces sp. AC04842      | RGDLLRPVLR TDVEIERAVRRDVLGATLR LTPRALALAV EDGVVTLTGRL E  |
| Streptomyces sp. AC00383      | KTRMVHA AVRHLLEQSPGW KQVSGGQTVPISQADILVTW HSLATYAMRKLR   |
